# Supplementary material
Source: PubMed Central journal article supplement (PMC4289446)

**Title:**

Identification of p38 beta as a therapeutic target for the treatment of Cutaneous T-Cell Lymphoma

**Authors:**

Meghan Bliss-Moreau, C Coarfa, PH Gunaratne, J Guitart, NL Krett, and ST Rosen

**Supplemental Figure Legends:****Supplemental Figure S1. Confirmation of cell death induced by small-molecule inhibitors.**

Hut78 cells were cultured with Enz, ARA, Enz+ARA, or DMSO and collected after 3 days. Data from four replicates were averaged. **(a)** Apoptosis measured by Annexin V staining and measured by flow cytometry. Positive stained cells quantified as percentage of total single cells. **(b)** Representative flow plots from **a**. **(c)** mRNA expression measured by qRT-PCR, normalized to house-keeping genes, and normalized to DMSO treatment. **(d)** Total  $\beta$ -catenin protein expression, normalized to  $\beta$ -actin, measured by immunoblot. **(e)** Quantification of **d**.

**Supplemental Table S1. Small-molecule microarray GSEA pathways: statistical values, Figure 1 order.****Supplemental Figure S2. Pathways enriched and genes modulated by combined small-**

**molecule treatment of Hut78 cells.** Fold changes for each treatment (Enz, ARA, Enz+ARA) normalized to DMSO for common genes of GSEA significant pathway. **(a)** T-Cell Receptor signaling pathway genes modulated by combination treatment. **(b)** p38 $\alpha/\beta$  downstream signaling pathway genes modulated by Enz+ARA. **(a)** and **(b)** both pathways share MAPK11 (p38 $\beta$ ).

**Supplemental Figure S3. Confirmation and validation of drug treatment microarray experiment.** H9 and Hut78 cells were cultured with standard Enz+ARA drug treatment conditions. Data from three replicates were averaged. **(a)** PARP protein cleavage, normalized to  $\alpha$ -tubulin, measured by immunoblot. Representative immunoblot images of three replicates. **(b)** Apoptosis measured by Annexin V staining and measured by flow cytometry. Positive stained cells quantified as percentage of total single cells. **(c)** Representative flow plots from **b**. **(d)** AXIN2, CD4, ICOS, and LAT mRNA expression measured by qRT-PCR, normalized to housekeeping genes, and normalized to DMSO treatment as described in materials and methods.

**Supplemental Table S2. SS patient GSEA pathways: statistical values, Figure 2 order.**

**Supplemental Figure S4. Pathways enriched and genes modulated in SS patient samples.** Fold changes for common genes of GSEA significant pathway. **(a)** T-Cell Receptor signaling pathway genes modulated in SS patients. **(b)** MAPK signaling pathway genes modulated in SS patients. **(a)** and **(b)** both pathways share MAPK11 (p38 $\beta$ ).

**Supplemental Table S3. Negative correlation gene list: FC 89 genes up-regulated in SS patients and down-regulated Enz+ARA combined drug treatment Hut78 cells.**

**Supplemental Table S4. Negative correlation gene list: FC 34 genes down-regulated in SS patients and up-regulated Enz+ARA combined drug treatment Hut78 cells.**

**Supplemental Figure S5. Quantification of p38-isoform protein expression in SS cell lines after small-molecule inhibitor treatment and endogenous healthy volunteers and patient samples p38 isoform immunoblots.** (a-d) H9 and Hut78 cells were treated with standard Enz+ARA treatment and collected. Data from three replicates were averaged. For graphic representation, p38 isoform expression was normalized to loading control ( $\alpha$ -tubulin) expression and then normalized to DMSO control. (a) p38 $\alpha$  (b) p38 $\beta$  (c) p38 $\gamma$  (d) p38 $\delta$ . (e) p38 isoforms protein expression, normalized to  $\alpha$ -tubulin, were measured by immunoblot. (Quantification, Figure 3d).

**Supplemental Figure S6. Confirmation of cell death induced by p38 small-molecule inhibitors in SS cell lines.** H9 and Hut78 cells were cultured with a dose range of either SB202, SB203, or BIRB. (a,c,e) PARP protein cleavage, normalized to  $\alpha$ -tubulin, measured by immunoblot. Representative immunoblot images of three replicates. (b,d,f) Representative flow cytometry plots from Figure 4a. (a,b) SB202 (c,d) SB203 (e,f) BIRB.

**Supplemental Figure S7. Example of primary patient sample flow cytometry gating for PBMC p38 drug treatment experiments.** PBMCs were harvested, treated with increasing doses of SB202, SB203 or BIRB. Apoptosis was measured by Annexin V or Cleaved Caspase 3/7 staining and measured by flow cytometry. Positive stained cells quantified as percentage total PBMCs. (a) SB202 treatment (b) SB203 treatment (c) BIRB treatment.

**Supplemental Figure S8. Importance of p38 signaling in primary SS patient samples, confirmation of cell death by Cleaved Caspase 3/7 staining.** (a-c) PBMCs were harvested from SS patients (n=3) and healthy volunteers (n=5) and treated with increasing concentrations of SB202, SB203, or BIRB. Apoptosis measured by Cleaved Caspase 3/7 staining and

measured by flow cytometry. Positive stained cells quantified as percentage of total PBMCs.

Example of PBMC gating schematics for Cleaved Caspase 3/7 over p38 dose concentrations

can be seen in Supplemental Figure 7, online. **(a)** SB202 **(b)** SB203 **(c)** BIRB.

## Supplemental Figure 1: Confirmation of cell death induced by small-molecule inhibitors.

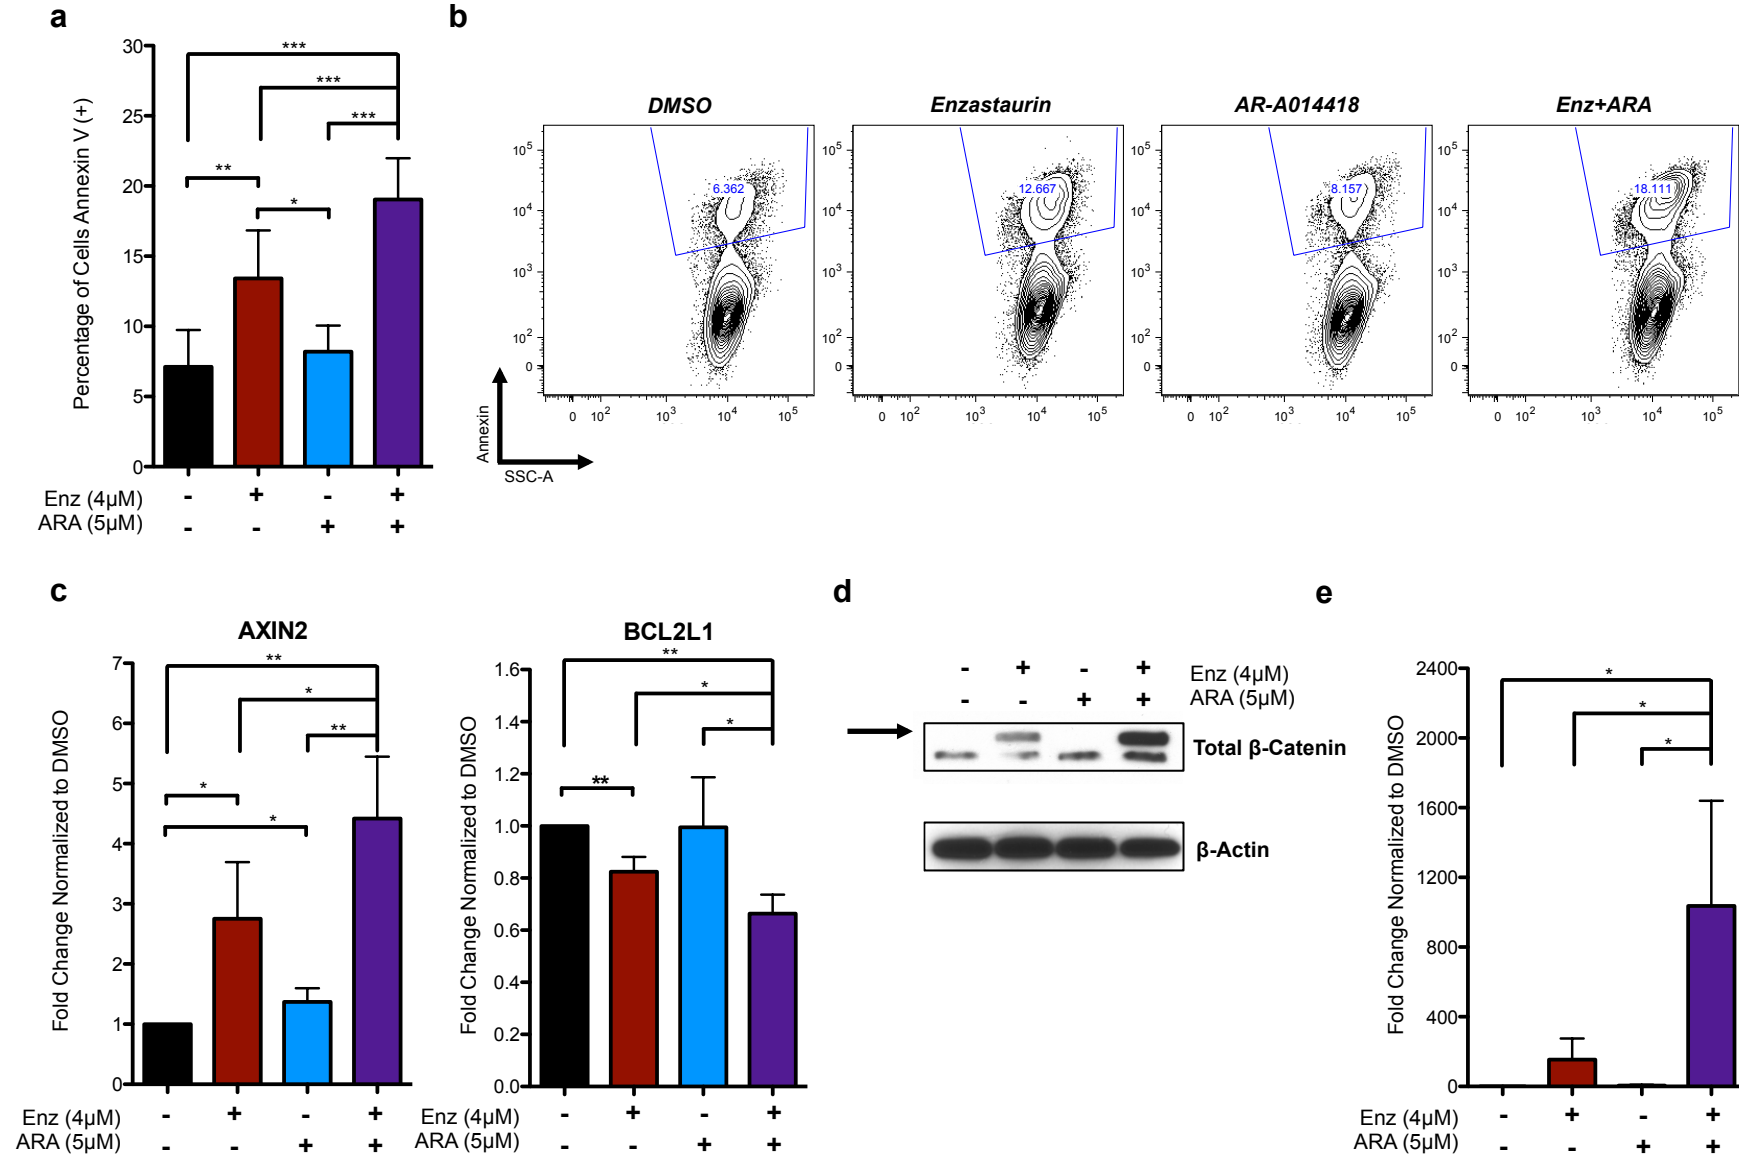

Supplemental Table S1. Small-molecule microarray GSEA pathways: statistical values, Figure 1 order.

| <b>Gene Set Name and Description</b>                                                                         | <b>p-value</b> | <b>FDR</b> | <b># Genes in Gene Set (K)</b> | <b># Genes in Overlap (k)</b> | <b>k/K</b> |
|--------------------------------------------------------------------------------------------------------------|----------------|------------|--------------------------------|-------------------------------|------------|
| REACTOME_IMMUNE_SYSTEM<br><i>Genes involved in Immune System</i>                                             | 4.55E-11       | 6.61E-08   | 933                            | 70                            | 0.0750     |
| REACTOME_ADAPTIVE_IMMUNE_SYSTEM<br><i>Genes involved in Adaptive Immune System</i>                           | 3.24E-07       | 0.00005    | 539                            | 41                            | 0.0761     |
| REACTOME_CYTOKINE_SIGNALING_IN_IMMUNE_SYSTEM<br><i>Genes involved in Cytokine Signaling in Immune system</i> | 2.11E-06       | 0.00020    | 270                            | 25                            | 0.0926     |
| REACTOME_INNATE_IMMUNE_SYSTEM<br><i>Genes involved in Innate Immune System</i>                               | 0.00164        | 0.03270    | 279                            | 19                            | 0.0681     |
| KEGG_TOLL_LIKE_RECEPTOR_SIGNALING_PATHWAY<br><i>Toll-like receptor signaling pathway</i>                     | 0.00002        | 0.00112    | 102                            | 13                            | 0.1275     |
| REACTOME_MHC_CLASS_II_ANTIGEN_PRESENTATION<br><i>Genes involved in MHC class II antigen presentation</i>     | 0.00001        | 0.00037    | 91                             | 13                            | 0.1429     |
| KEGG_ANTIGEN_PROCESSING_AND_PRESENTATION<br><i>Antigen processing and presentation</i>                       | 4.74E-06       | 0.00031    | 89                             | 13                            | 0.1461     |
| REACTOME_COSTIMULATION_BY_THE_CD28_FAMILY<br><i>Genes involved in Costimulation by the CD28 family</i>       | 4.31E-06       | 0.00030    | 63                             | 11                            | 0.1746     |
| KEGG_T_CELL_RECEPTOR_SIGNALING_PATHWAY<br><i>T-cell receptor signaling pathway</i>                           | 0.00235        | 0.04160    | 108                            | 10                            | 0.0926     |
| PID_IL2_1PATHWAY<br><i>IL2-mediated signaling events</i>                                                     | 0.00033        | 0.01080    | 55                             | 8                             | 0.1455     |
| BIOCARTA_NKT_PATHWAY<br><i>Selective expression of chemokine receptors during T-cell polarization</i>        | 0.00202        | 0.03710    | 29                             | 5                             | 0.1724     |
| REACTOME_INTERFERON_SIGNALING<br><i>Genes involved in Interferon Signaling</i>                               | 8.14E-07       | 0.00008    | 159                            | 19                            | 0.1195     |
| REACTOME_INTERFERON_GAMMA_SIGNALING<br><i>Genes involved in Interferon gamma signaling</i>                   | 6.00E-07       | 0.00007    | 63                             | 12                            | 0.1905     |
| PID_IL12_2PATHWAY<br><i>IL12-mediated signaling events</i>                                                   | 4.31E-06       | 0.00030    | 63                             | 11                            | 0.1746     |
| REACTOME_INTERFERON_ALPHA_BETA_SIGNALING<br><i>Genes involved in Interferon alpha/beta signaling</i>         | 0.00003        | 0.00156    | 64                             | 10                            | 0.1562     |
| PID_IFNGPATHWAY<br><i>IFN-gamma pathway</i>                                                                  | 0.00154        | 0.03160    | 40                             | 6                             | 0.1500     |
| KEGG_PATHWAYS_IN_CANCER<br><i>Pathways in cancer</i>                                                         | 2.64E-06       | 0.00023    | 328                            | 28                            | 0.0854     |

|                                                                                                                    |         |         |     |    |        |
|--------------------------------------------------------------------------------------------------------------------|---------|---------|-----|----|--------|
| KEGG_MAPK_SIGNALING_PATHWAY<br><i>MAPK signaling pathway</i>                                                       | 0.00239 | 0.04190 | 267 | 18 | 0.0674 |
| KEGG_CHEMOKINE_SIGNALING_PATHWAY<br><i>Chemokine signaling pathway</i>                                             | 0.00117 | 0.02660 | 190 | 15 | 0.0789 |
| KEGG_JAK_STAT_SIGNALING_PATHWAY<br><i>Jak-STAT signaling pathway</i>                                               | 0.00045 | 0.01340 | 155 | 14 | 0.0903 |
| REACTOME_SIGNALING_BY_INSULIN_RECEPTOR<br><i>Genes involved in Signaling by Insulin receptor</i>                   | 0.00017 | 0.00647 | 108 | 12 | 0.1111 |
| REACTOME_DOWNSTREAM_SIGNALING_OF_ACTIVATED_FGFR<br><i>Genes involved in Downstream signaling of activated FGFR</i> | 0.00132 | 0.02940 | 100 | 10 | 0.1000 |
| PID_BETACATENIN_NUC_PATHWAY<br><i>Regulation of nuclear beta catenin signaling and target gene transcription</i>   | 0.00022 | 0.00803 | 80  | 10 | 0.1250 |
| REACTOME_INSULIN_RECEPTOR_SIGNALLING_CASCADE<br><i>Genes involved in Insulin receptor signalling cascade</i>       | 0.00178 | 0.03390 | 87  | 9  | 0.1034 |
| KEGG_TGF_BETA_SIGNALING_PATHWAY<br><i>TGF-beta signaling pathway</i>                                               | 0.00165 | 0.03270 | 86  | 9  | 0.1047 |
| KEGG_B_CELL_RECEPTOR_SIGNALING_PATHWAY<br><i>B cell receptor signaling pathway</i>                                 | 0.00061 | 0.01650 | 75  | 9  | 0.1200 |
| PID_P38ALPHABETADOWNSTREAMPATHWAY<br><i>Signaling mediated by p38-alpha and p38-beta</i>                           | 0.00002 | 0.00112 | 38  | 8  | 0.2105 |
| REACTOME_PI3K_CASCADE<br><i>Genes involved in PI3K Cascade</i>                                                     | 0.00183 | 0.03410 | 71  | 8  | 0.1127 |
| PID_SHP2_PATHWAY<br><i>SHP2 signaling</i>                                                                          | 0.00235 | 0.04160 | 58  | 7  | 0.1207 |
| REACTOME_PD1_SIGNALING<br><i>Genes involved in PD-1 signaling</i>                                                  | 0.00019 | 0.00724 | 18  | 5  | 0.2778 |

### Supplemental Figure 2. Pathways enriched and genes modulated by combined small-molecule treatment of Hut78 cells.

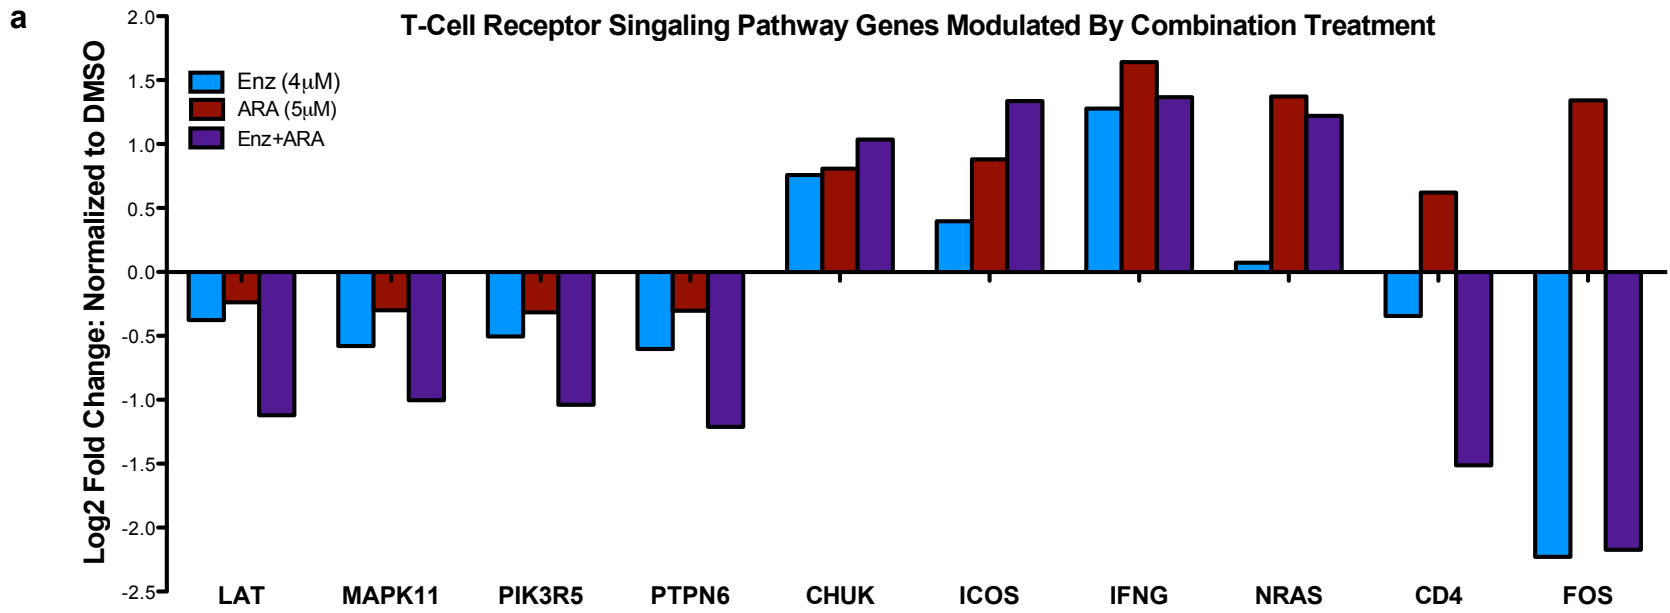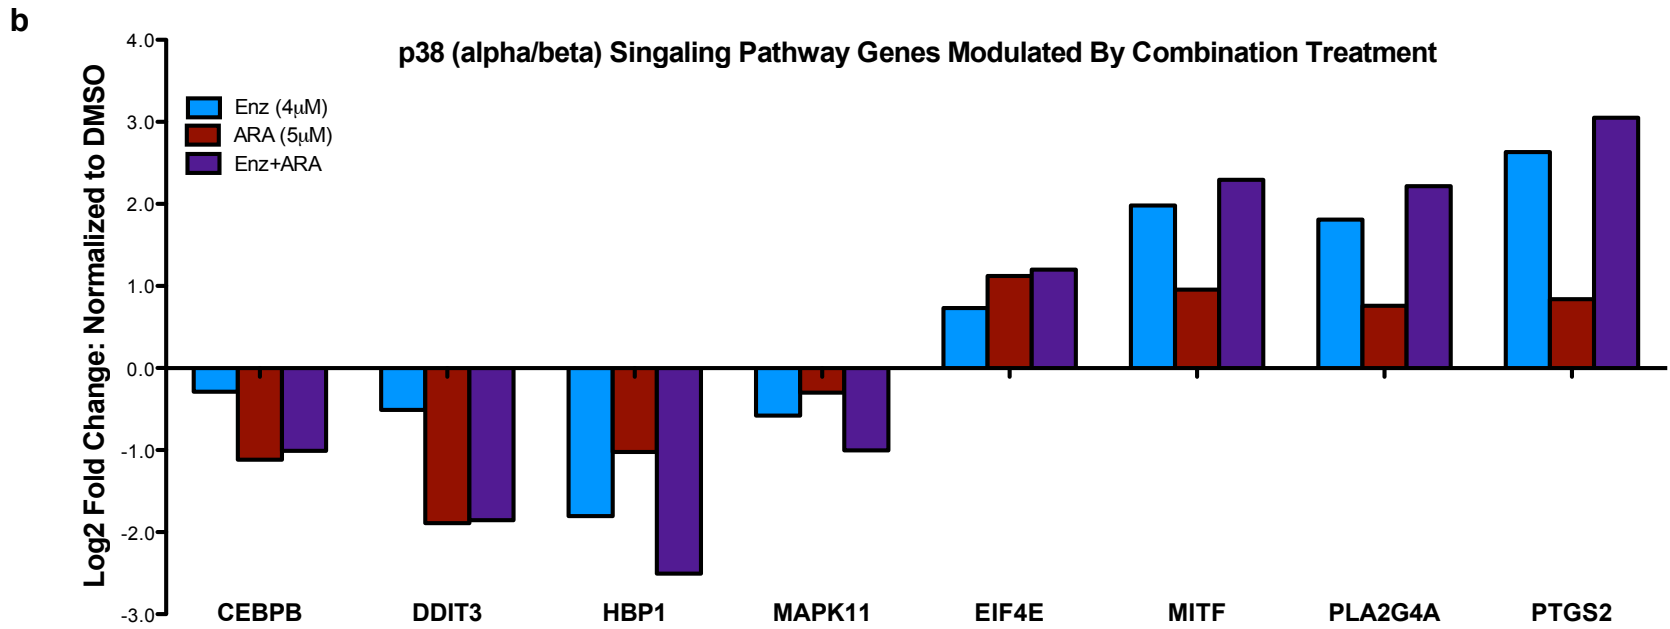





Supplemental Table S2. SS patient GSEA pathways: statistical values, Figure 2 order.

| <b>Gene Set Name and Description</b>                                                            | <b>p-value</b> | <b>FDR</b> | <b># Genes in Gene Set (K)</b> | <b># Genes in Overlap (k)</b> | <b>k/K</b> |
|-------------------------------------------------------------------------------------------------|----------------|------------|--------------------------------|-------------------------------|------------|
| KEGG_PATHWAYS_IN_CANCER<br><i>Pathways in cancer</i>                                            | 0.000E+00      | 0.000E+00  | 328                            | 83                            | 0.2530     |
| KEGG_CYTOKINE_CYTOKINE_RECEPTOR_INTERACTION<br><i>Cytokine-cytokine receptor interaction</i>    | 0.000E+00      | 0.000E+00  | 267                            | 74                            | 0.2772     |
| KEGG_MAPK_SIGNALING_PATHWAY<br><i>MAPK signaling pathway</i>                                    | 6.660E-16      | 2.480E-14  | 267                            | 55                            | 0.2060     |
| KEGG_CHEMOKINE_SIGNALING_PATHWAY<br><i>Chemokine signaling pathway</i>                          | 1.330E-15      | 4.130E-14  | 190                            | 45                            | 0.2368     |
| KEGG_JAK_STAT_SIGNALING_PATHWAY<br><i>Jak-STAT signaling pathway</i>                            | 3.660E-11      | 5.230E-10  | 155                            | 34                            | 0.2194     |
| KEGG_ENDOCYTOSIS<br><i>Endocytosis</i>                                                          | 4.790E-08      | 3.180E-07  | 183                            | 32                            | 0.1749     |
| KEGG_HEMATOPOIETIC_CELL_LINEAGE<br><i>Hematopoietic cell lineage</i>                            | 1.490E-14      | 3.950E-13  | 88                             | 29                            | 0.3295     |
| KEGG_TOLL_LIKE_RECEPTOR_SIGNALING_PATHWAY<br><i>Toll-like receptor signaling pathway</i>        | 1.190E-09      | 1.300E-08  | 102                            | 25                            | 0.2451     |
| KEGG_ANTIGEN_PROCESSING_AND_PRESENTATION<br><i>Antigen processing and presentation</i>          | 1.780E-09      | 1.740E-08  | 89                             | 23                            | 0.2584     |
| KEGG_CELL_ADHESION_MOLECULES_CAMS<br><i>Cell adhesion molecules CAMS</i>                        | 4.840E-06      | 1.700E-05  | 134                            | 23                            | 0.1716     |
| KEGG_T_CELL_RECEPTOR_SIGNALING_PATHWAY<br><i>T-cell receptor signaling pathway</i>              | 3.900E-07      | 1.860E-06  | 108                            | 22                            | 0.2037     |
| KEGG_TGF_BETA_SIGNALING_PATHWAY<br><i>TGF-beta signaling pathway</i>                            | 2.880E-06      | 1.070E-05  | 86                             | 18                            | 0.2093     |
| KEGG_B_CELL_RECEPTOR_SIGNALING_PATHWAY<br><i>B cell receptor signaling pathway</i>              | 3.350E-05      | 1.000E-04  | 75                             | 15                            | 0.2000     |
| KEGG_ARGININE_AND_PROLINE_METABOLISM<br><i>Arginine and proline metabolism</i>                  | 1.380E-05      | 4.340E-05  | 54                             | 13                            | 0.2407     |
| KEGG_GLYCINE_SERINE_AND_THREONINE_METABOLISM<br><i>Glycine, serine and threonine metabolism</i> | 8.200E-06      | 2.830E-05  | 31                             | 10                            | 0.3226     |
| KEGG_ABC_TRANSPORTERS<br><i>ABC transporters</i>                                                | 1.040E-03      | 2.190E-03  | 44                             | 9                             | 0.2045     |
| KEGG_PRIMARY_IMMUNODEFICIENCY<br><i>Primary immunodeficiency</i>                                | 1.680E-04      | 4.540E-04  | 35                             | 9                             | 0.2571     |

### Supplemental Figure 4. Pathways enriched and genes modulated in SS patient samples.

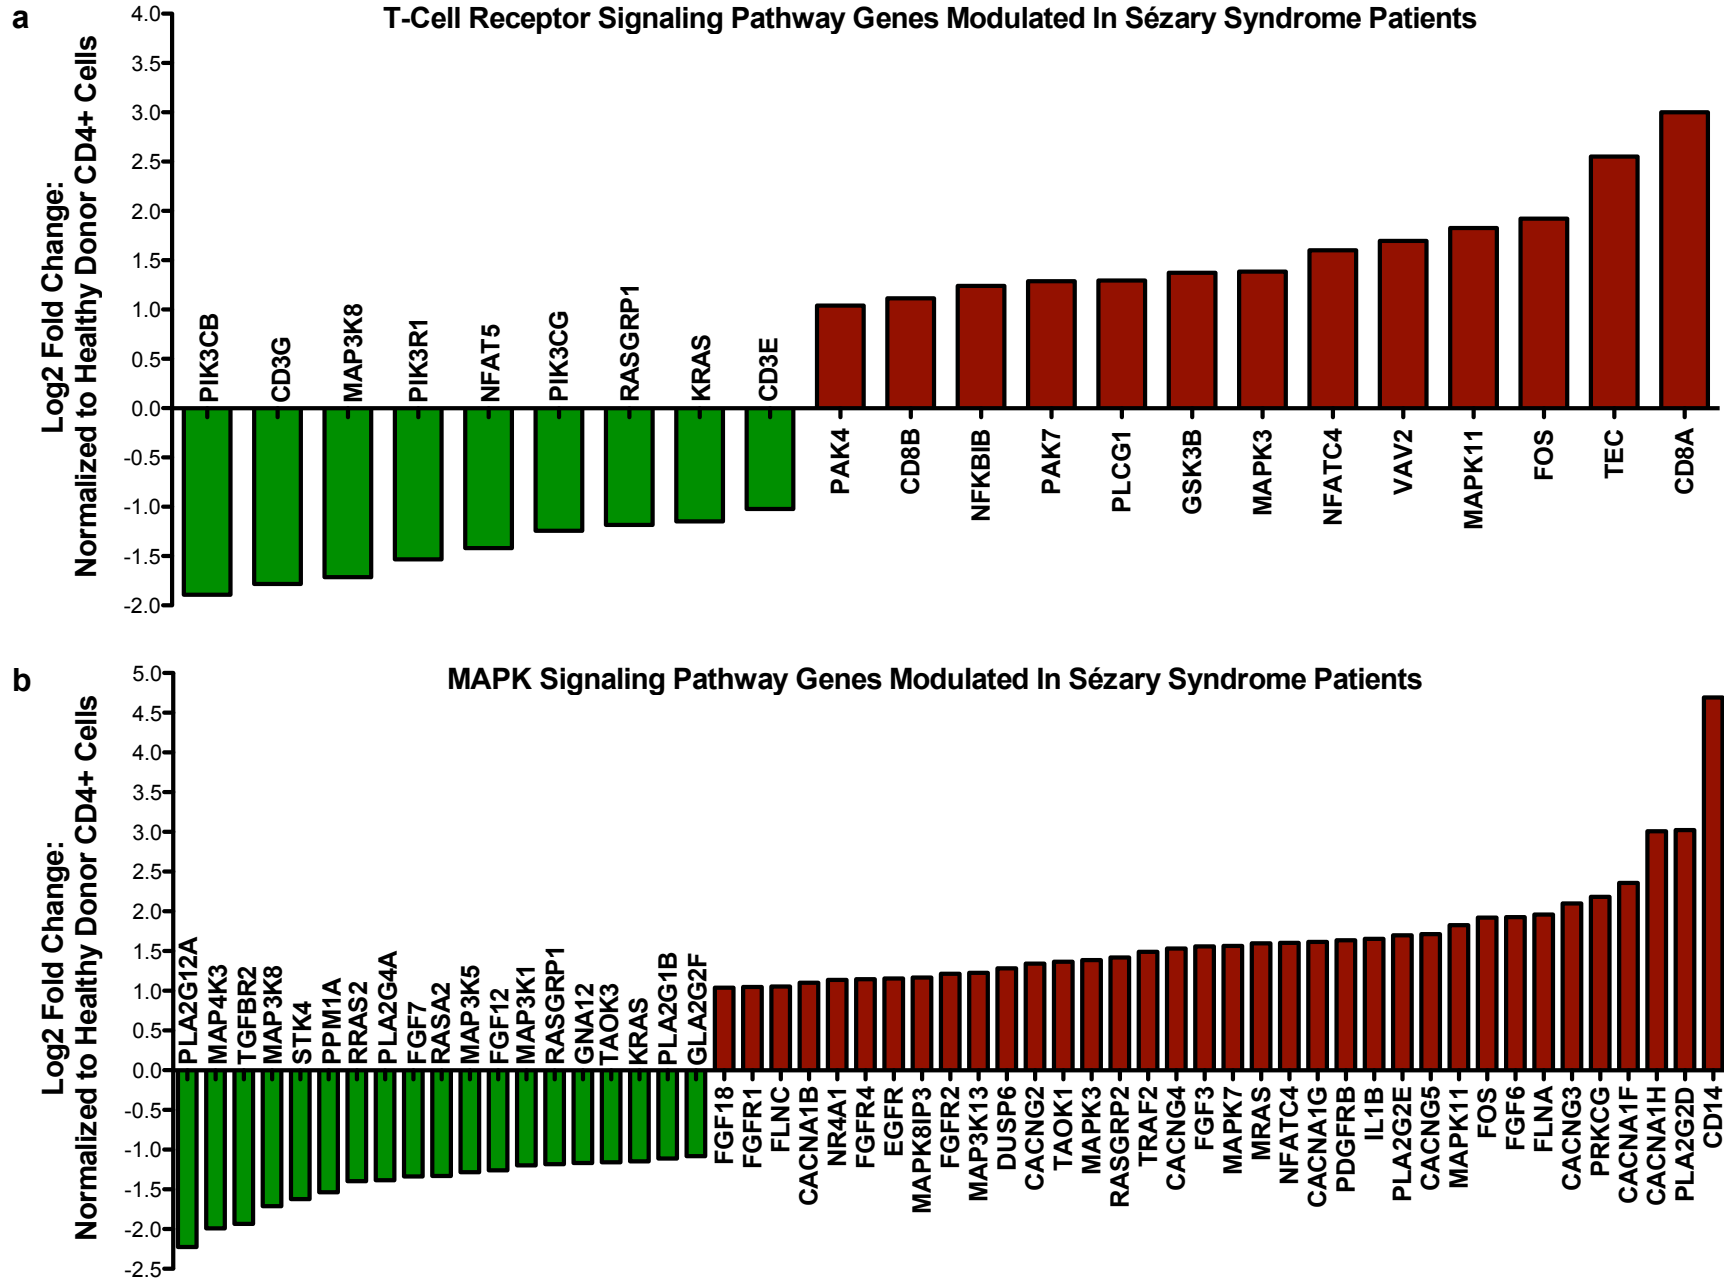

**Supplemental Table S3. Negative correlation gene list: FC 89 genes up-regulated in SS patients cells and down-regulated Enz+ARA combined drug treatment Hut78**

| Gene     | Description                                                                               | CTCL Up | Enz+ARA Down |
|----------|-------------------------------------------------------------------------------------------|---------|--------------|
| ABCA4    | ATP-binding cassette, sub-family A (ABC1), member 4                                       | 5.0994  | 0.1844       |
| ABCB6    | ATP-binding cassette, sub-family B (MDR/TAP), member 6                                    | 2.2680  | 0.4117       |
| ADAM29   | ADAM metallopeptidase domain 29                                                           | 2.2867  | 0.1437       |
| ADM2     | adrenomedullin 2                                                                          | 2.8672  | 0.4541       |
| AIF1     | allograft inflammatory factor 1                                                           | 3.2304  | 0.3072       |
| AMHR2    | anti-Mullerian hormone receptor, type II                                                  | 6.6147  | 0.4746       |
| ANXA9    | annexin A9                                                                                | 2.3876  | 0.1968       |
| BLVRB    | biliverdin reductase B (flavin reductase (NADPH))                                         | 3.5992  | 0.4940       |
| BPHL     | biphenyl hydrolase-like (serine hydrolase; breast epithelial mucin-associated antigen)    | 2.3609  | 0.4410       |
| C19orf73 | chromosome 19 open reading frame 73                                                       | 2.4600  | 0.3028       |
| C8G      | complement component 8, gamma polypeptide                                                 | 2.6734  | 0.2845       |
| C9orf53  | chromosome 9 open reading frame 53                                                        | 2.4874  | 0.3162       |
| CACNA1H  | calcium channel, voltage-dependent, alpha 1H subunit                                      | 8.0428  | 0.3014       |
| CCR8     | chemokine (C-C motif) receptor 8                                                          | 2.4857  | 0.1795       |
| CCRL2    | chemokine (C-C motif) receptor-like 2                                                     | 2.3735  | 0.2394       |
| CD40     | CD40 molecule, TNF receptor superfamily member 5                                          | 2.0031  | 0.2080       |
| CDKN1A   | cyclin-dependent kinase inhibitor 1A (p21, Cip1)                                          | 5.1118  | 0.4981       |
| CDKN2D   | cyclin-dependent kinase inhibitor 2D (p19, inhibits CDK4)                                 | 4.0748  | 0.3879       |
| CHMP1B   | chromatin modifying protein 1B                                                            | 2.1019  | 0.3897       |
| CPNE6    | copine VI (neuronal)                                                                      | 3.7185  | 0.1423       |
| CUL7     | cullin 7                                                                                  | 2.6682  | 0.4515       |
| CX3CR1   | chemokine (C-X3-C motif) receptor 1                                                       | 2.3245  | 0.1962       |
| CYBRD1   | cytochrome b reductase 1                                                                  | 4.2082  | 0.3603       |
| CYP27A1  | cytochrome P450, family 27, subfamily A, polypeptide 1                                    | 9.0889  | 0.4897       |
| DAPK2    | death-associated protein kinase 2                                                         | 2.0204  | 0.2088       |
| DDAH2    | dimethylarginine dimethylaminohydrolase 2                                                 | 2.3856  | 0.4360       |
| DHX58    | DEAH (Asp-Glu-Ala-His) box polypeptide 58                                                 | 2.5131  | 0.4522       |
| DNAJB5   | DnaJ (Hsp40) homolog, subfamily B, member 5                                               | 2.0755  | 0.4413       |
| EMID1    | EMI domain containing 1                                                                   | 2.9442  | 0.4945       |
| FAM127B  | family with sequence similarity 127B                                                      | 2.1067  | 0.2436       |
| FHOD3    | formin homology 2 domain containing 3                                                     | 2.3699  | 0.1168       |
| FOS      | v-fos FBJ murine osteosarcoma viral oncogene homolog                                      | 3.7904  | 0.2217       |
| GNA14    | guanine nucleotide binding protein (G protein), alpha 14                                  | 2.6283  | 0.3153       |
| GPR132   | G protein-coupled receptor 132                                                            | 7.7095  | 0.3790       |
| GPR19    | G protein-coupled receptor 19                                                             | 3.2232  | 0.0719       |
| GRP      | gastrin-releasing peptide                                                                 | 2.1925  | 0.2257       |
| HDAC6    | histone deacetylase 6                                                                     | 2.1014  | 0.4477       |
| IQSEC3   | IQ motif and Sec7 domain 3                                                                | 2.8492  | 0.2456       |
| JUP      | junction plakoglobin                                                                      | 3.0046  | 0.3455       |
| KCND1    | potassium voltage-gated channel, Shal-related subfamily, member 1                         | 2.0569  | 0.3107       |
| KCNN4    | potassium intermediate/small conductance calcium-activated channel, subfamily N, member 4 | 3.6160  | 0.3627       |
| KCNQ1DN  | KCNQ1 downstream neighbor                                                                 | 2.3728  | 0.2578       |
| KRT81    | keratin 81                                                                                | 4.2320  | 0.1818       |
| LAMA3    | laminin, alpha 3                                                                          | 3.3160  | 0.2728       |
| LAT2     | linker for activation of T cells family, member 2                                         | 2.2018  | 0.2957       |

|               |                                                                                                  |               |               |
|---------------|--------------------------------------------------------------------------------------------------|---------------|---------------|
| LST1          | leukocyte specific transcript 1                                                                  | 2.0606        | 0.3961        |
| LTBP4         | latent transforming growth factor beta binding protein 4                                         | 2.9161        | 0.4356        |
| <b>MAPK11</b> | <b>mitogen-activated protein kinase 11</b>                                                       | <b>3.5473</b> | <b>0.4991</b> |
| MAST1         | microtubule associated serine/threonine kinase 1                                                 | 3.5092        | 0.2175        |
| MCPH1         | microcephaly, primary autosomal recessive 1                                                      | 2.8295        | 0.3642        |
| MEGF6         | multiple EGF-like-domains 6                                                                      | 2.0582        | 0.1381        |
| MGAT2         | mannosyl (alpha-1,6-)-glycoprotein beta-1,2-N-acetylglucosaminyltransferase                      | 2.0672        | 0.4173        |
| MLXIPL        | MLX interacting protein-like                                                                     | 2.2621        | 0.1719        |
| MTHFR         | 5,10-methylenetetrahydrofolate reductase (NADPH)                                                 | 2.0385        | 0.1724        |
| MXD3          | MAX dimerization protein 3                                                                       | 4.2940        | 0.1540        |
| NOL3          | nucleolar protein 3 (apoptosis repressor with CARD domain)                                       | 2.0210        | 0.2145        |
| NQO2          | NAD(P)H dehydrogenase, quinone 2                                                                 | 2.0148        | 0.4817        |
| NRGN          | neurogranin (protein kinase C substrate, RC3)                                                    | 5.9865        | 0.4038        |
| NXF3          | nuclear RNA export factor 3                                                                      | 2.0864        | 0.2840        |
| PDE1B         | phosphodiesterase 1B, calmodulin-dependent                                                       | 5.3156        | 0.1038        |
| PDE6G         | phosphodiesterase 6G, cGMP-specific, rod, gamma                                                  | 4.7937        | 0.3603        |
| PFKFB4        | 6-phosphofructo-2-kinase/fructose-2,6-biphosphatase 4                                            | 2.7001        | 0.1095        |
| PLEKHH3       | pleckstrin homology domain containing, family H (with MyTH4 domain) member 3                     | 2.0466        | 0.4773        |
| PLTP          | phospholipid transfer protein                                                                    | 2.2266        | 0.3077        |
| PPIL6         | peptidylprolyl isomerase (cyclophilin)-like 6                                                    | 5.6507        | 0.2460        |
| PPP2R5B       | protein phosphatase 2, regulatory subunit B (B56), beta isoform                                  | 2.5129        | 0.4495        |
| RAB38         | RAB38, member RAS oncogene family                                                                | 2.0891        | 0.2254        |
| RASSF4        | Ras association (RalGDS/AF-6) domain family 4                                                    | 2.0719        | 0.3488        |
| REEP2         | receptor accessory protein 2                                                                     | 12.5296       | 0.2951        |
| REN           | renin                                                                                            | 5.8544        | 0.3539        |
| RHBDL1        | rhomboid, veinlet-like 1 (Drosophila)                                                            | 2.9405        | 0.4618        |
| RNF125        | ring finger protein 125                                                                          | 2.6728        | 0.4308        |
| S100A9        | S100 calcium binding protein A9                                                                  | 17.0737       | 0.3809        |
| SCD           | stearoyl-CoA desaturase (delta-9-desaturase)                                                     | 3.6654        | 0.4964        |
| SEMA6C        | sema domain, transmembrane domain (TM), and cytoplasmic domain, (semaphorin) 6C                  | 4.2191        | 0.4660        |
| SEZ6L2        | seizure related 6 homolog (mouse)-like 2                                                         | 2.0840        | 0.3858        |
| SGCA          | sarcoglycan, alpha (50kDa dystrophin-associated glycoprotein)                                    | 2.7166        | 0.2940        |
| SLC37A1       | solute carrier family 37 (glycerol-3-phosphate transporter), member 1                            | 2.1674        | 0.4756        |
| SOAT2         | sterol O-acyltransferase 2                                                                       | 2.2380        | 0.3850        |
| STOML1        | stomatolipin (EPB72)-like 1                                                                      | 2.0203        | 0.3205        |
| TGM1          | transglutaminase 1 (K polypeptide epidermal type I, protein-glutamine-gamma-glutamyltransferase) | 2.2206        | 0.2185        |
| TIMP2         | TIMP metalloproteinase inhibitor 2                                                               | 5.9325        | 0.3384        |
| UNC93B1       | unc-93 homolog B1 (C. elegans)                                                                   | 3.1656        | 0.4755        |
| ZCWPW1        | zinc finger, CW type with PWWP domain 1                                                          | 4.7215        | 0.4432        |
| ZDHHC11       | zinc finger, DHHC-type containing 11                                                             | 2.4290        | 0.3403        |
| ZDHHC14       | zinc finger, DHHC-type containing 14                                                             | 3.8468        | 0.3937        |
| ZNF219        | zinc finger protein 219                                                                          | 2.5816        | 0.2999        |
| ZNF264        | zinc finger protein 264                                                                          | 2.6317        | 0.2708        |
| ZNF446        | zinc finger protein 446                                                                          | 3.5138        | 0.1587        |

**Supplemental Table S4. Negative correlation gene list: FC 34 genes down-regulated in SS patients and up-regulated Enz+ARA combined drug treatment Hut78**

| Gene     | Description                                                                               | CTCL Down | Enz+ARA Up |
|----------|-------------------------------------------------------------------------------------------|-----------|------------|
| ANKRD36  | ankyrin repeat domain 36                                                                  | 0.1253    | 5.7521     |
| ANKRD36B | ankyrin repeat domain 36B                                                                 | 0.0950    | 3.7497     |
| ANKRD55  | ankyrin repeat domain 55                                                                  | 0.1743    | 10.3316    |
| BMP2K    | BMP2 inducible kinase                                                                     | 0.4311    | 4.5525     |
| CCNJ     | cyclin J                                                                                  | 0.2646    | 3.7396     |
| DHODH    | dihydroorotate dehydrogenase                                                              | 0.4895    | 2.3574     |
| ETNK1    | ethanolamine kinase 1                                                                     | 0.4125    | 3.1431     |
| FERMT2   | fermitin family member 2                                                                  | 0.4675    | 4.4257     |
| GAN      | giant axonal neuropathy (gigaxonin)                                                       | 0.4362    | 2.5266     |
| HSPA4L   | heat shock 70kDa protein 4-like                                                           | 0.3260    | 2.0060     |
| IGJ      | immunoglobulin J polypeptide, linker protein for immunoglobulin alpha and mu polypeptides | 0.0912    | 4.5941     |
| IL18RAP  | interleukin 18 receptor accessory protein                                                 | 0.4415    | 4.1317     |
| KLF5     | Kruppel-like factor 5 (intestinal)                                                        | 0.4183    | 4.2300     |
| MDM1     | Mdm4, transformed 3T3 cell double minute 1, p53 binding protein (mouse)                   | 0.3446    | 3.1613     |
| MREG     | melanoregulin                                                                             | 0.2452    | 2.1818     |
| NRIP1    | nuclear receptor interacting protein 1                                                    | 0.1992    | 3.9799     |
| PAK1IP1  | PAK1 interacting protein 1                                                                | 0.3373    | 2.2436     |
| PLA2G4A  | phospholipase A2, group IVA (cytosolic, calcium-dependent)                                | 0.3832    | 4.6492     |
| POLR3G   | polymerase (RNA) III (DNA directed) polypeptide G (32kD)                                  | 0.3564    | 2.8058     |
| RND3     | Rho family GTPase 3                                                                       | 0.3808    | 5.1408     |
| RORA     | RAR-related orphan receptor A                                                             | 0.2033    | 2.9089     |
| RRAGD    | Ras-related GTP binding D                                                                 | 0.4574    | 2.2481     |
| RRP15    | ribosomal RNA processing 15 homolog ( <i>S. cerevisiae</i> )                              | 0.4211    | 3.1997     |
| SLC12A6  | solute carrier family 12 (potassium/chloride transporters), member 6                      | 0.4259    | 4.5719     |
| SOAT1    | sterol O-acyltransferase (acyl-Coenzyme A: cholesterol acyltransferase) 1                 | 0.4738    | 2.0171     |
| SPATA5L1 | spermatogenesis associated 5-like 1                                                       | 0.4646    | 2.0218     |
| TAF1A    | TATA box binding protein (TBP)-associated factor, RNA polymerase I, A, 48kDa              | 0.3519    | 2.1219     |
| TRAF3IP1 | TNF receptor-associated factor 3 interacting protein 1                                    | 0.3578    | 2.1714     |
| TRPC3    | transient receptor potential cation channel, subfamily C, member 3                        | 0.3425    | 6.4208     |
| VPS53    | vacuolar protein sorting 53 ( <i>S. cerevisiae</i> )                                      | 0.4826    | 6.9288     |
| YARS2    | tyrosyl-tRNA synthetase 2 (mitochondrial)                                                 | 0.4212    | 2.2284     |
| ZMYM5    | zinc finger, MYM-type 5                                                                   | 0.2170    | 2.2931     |
| ZNF280D  | zinc finger protein 280D                                                                  | 0.3360    | 3.3529     |
| ZNF292   | zinc finger protein 292                                                                   | 0.4644    | 7.3191     |

**Supplemental Figure 5. Quantification of p38-isoform protein expression in SS cell lines after small-molecule inhibitor treatment and endogenous healthy volunteers and patient samples p38 immunoblot.**

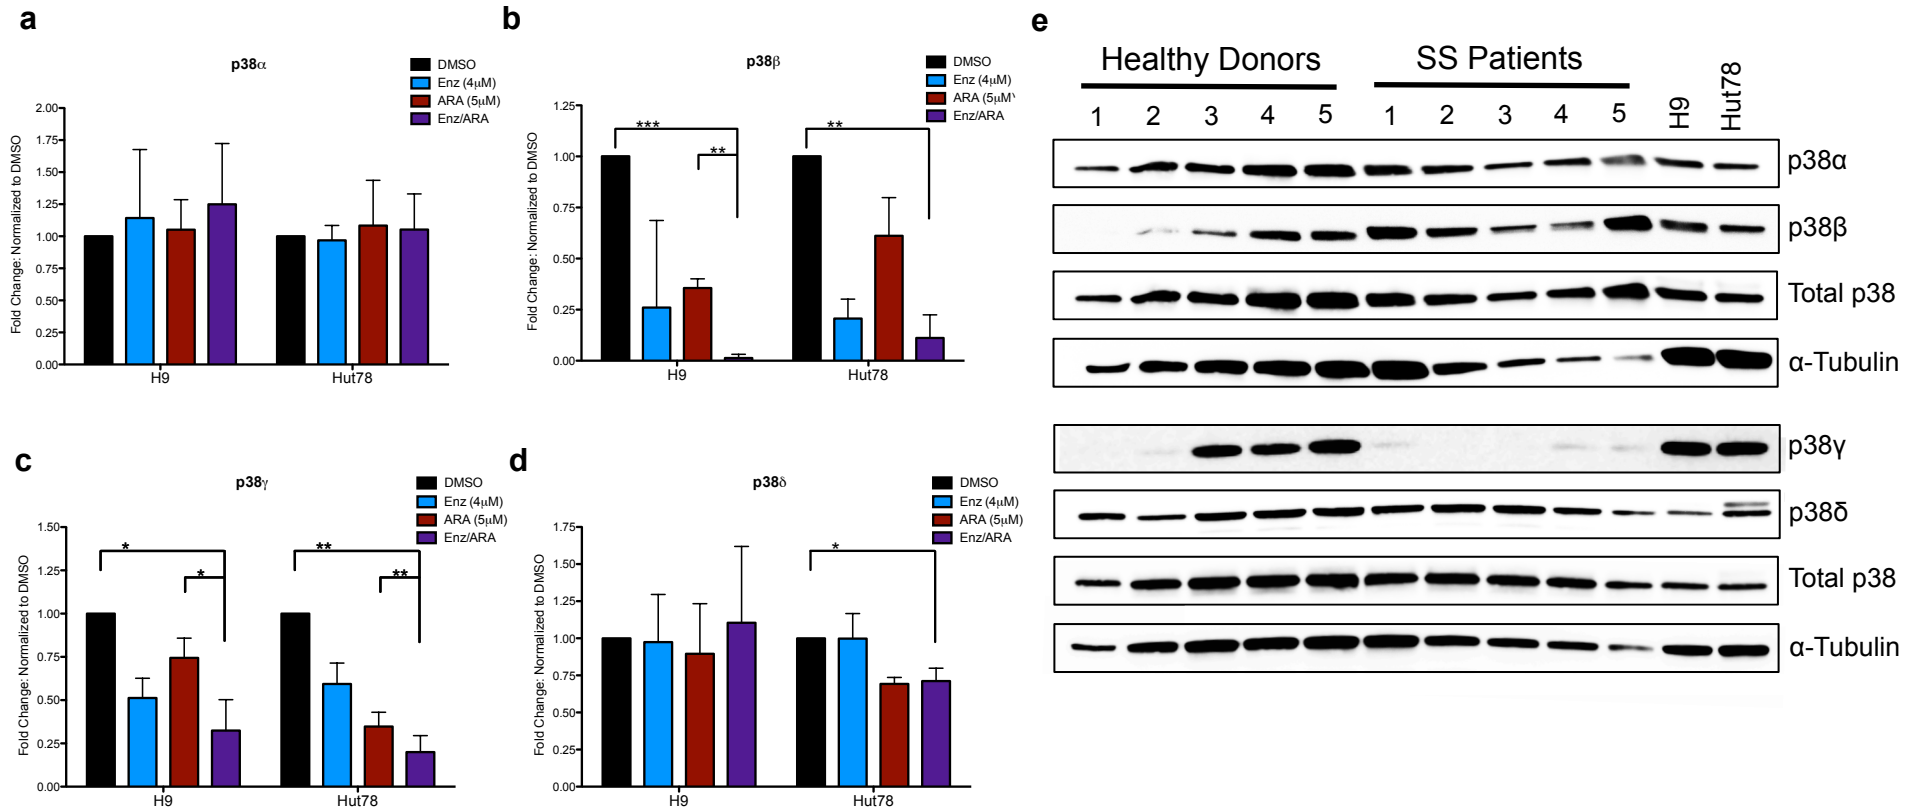

### Supplemental Figure 6. Confirmation of cell death induced by p38 small-molecule inhibitors in SS cell lines.

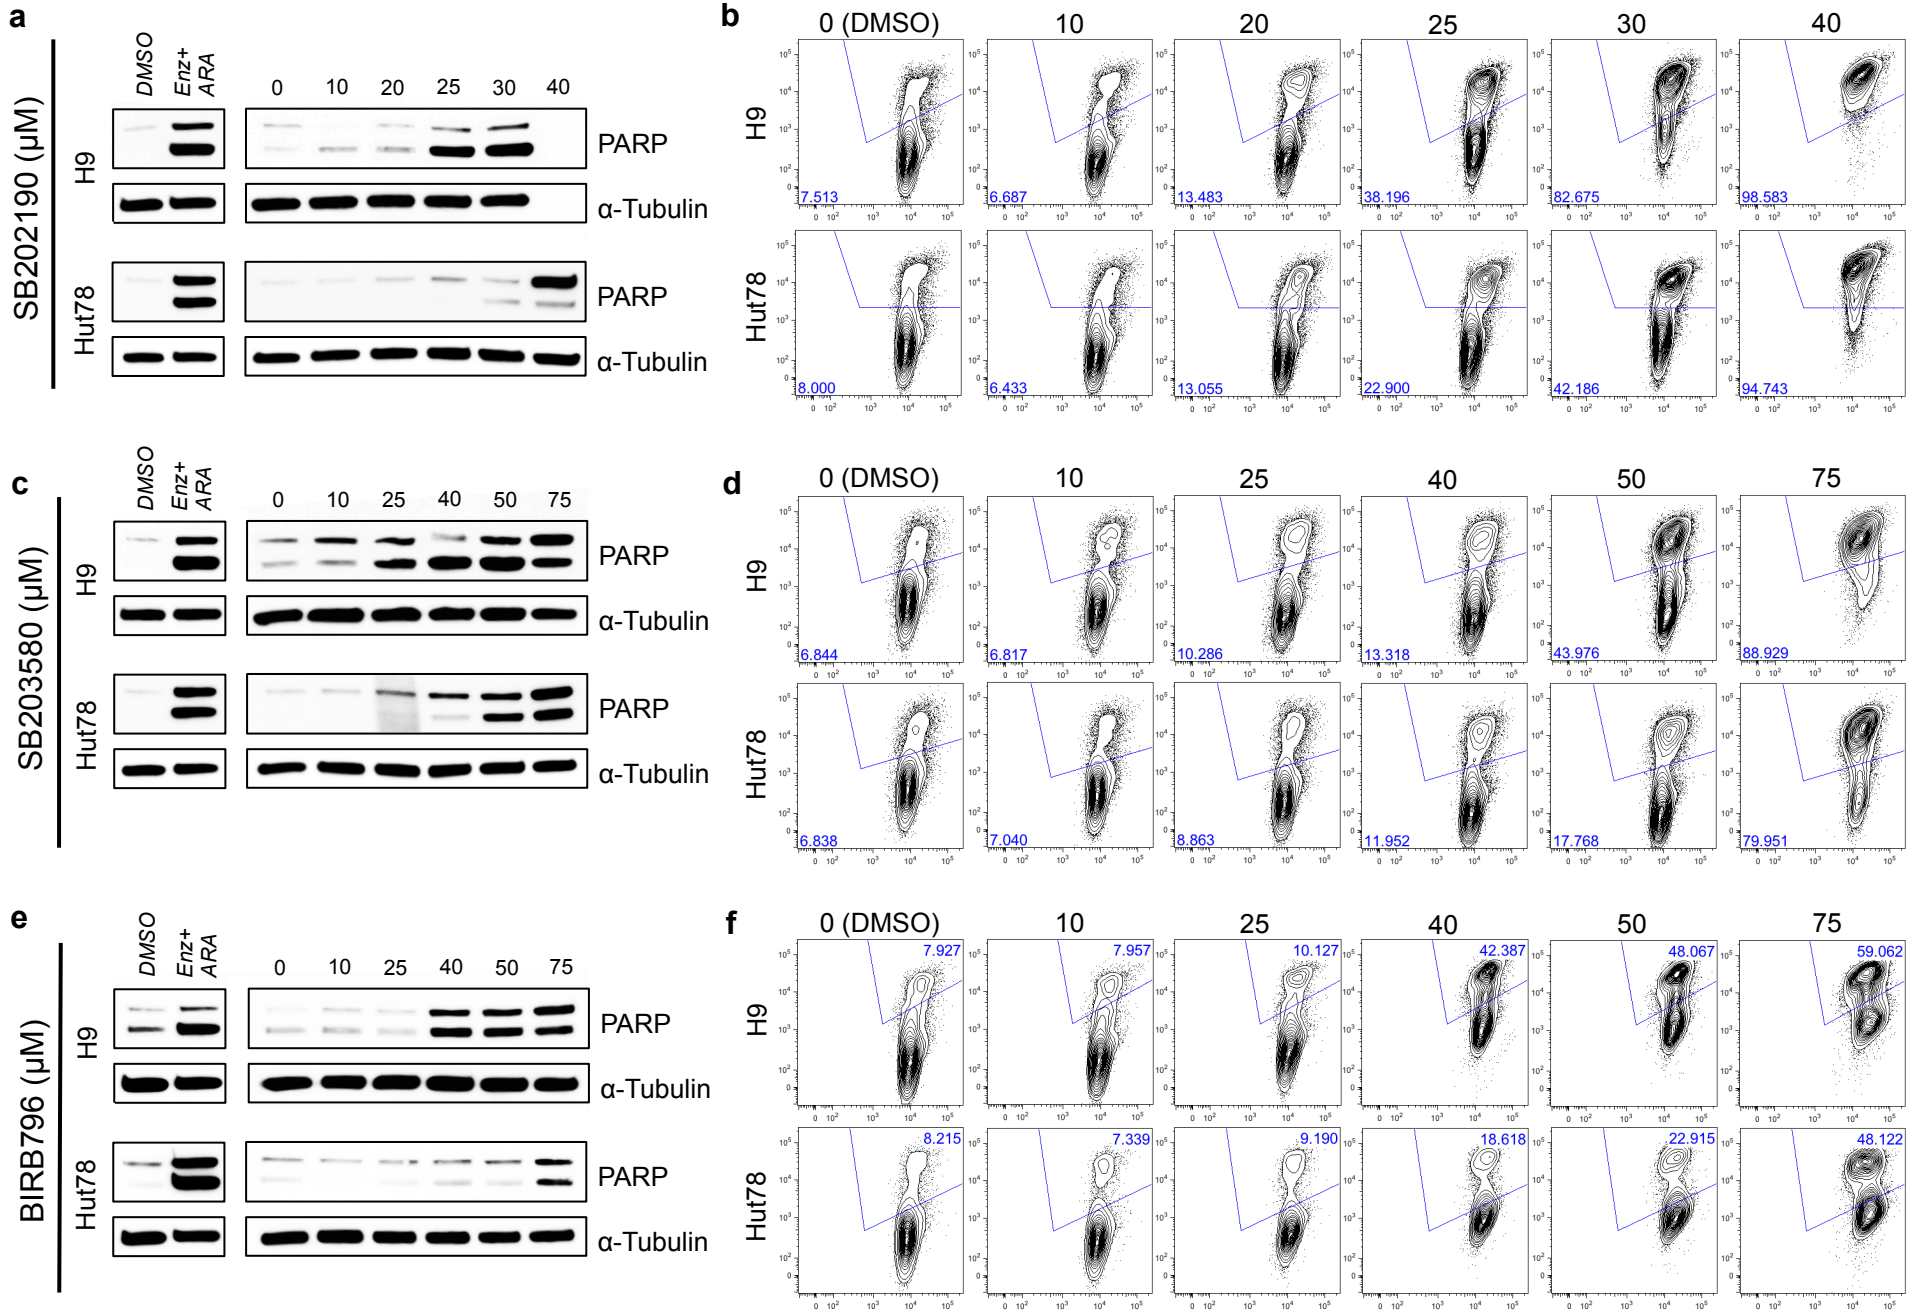



**Supplemental Figure S7. Example of primary patient sample flow cytometry gating for PBMC p38 drug treatment experiments.**

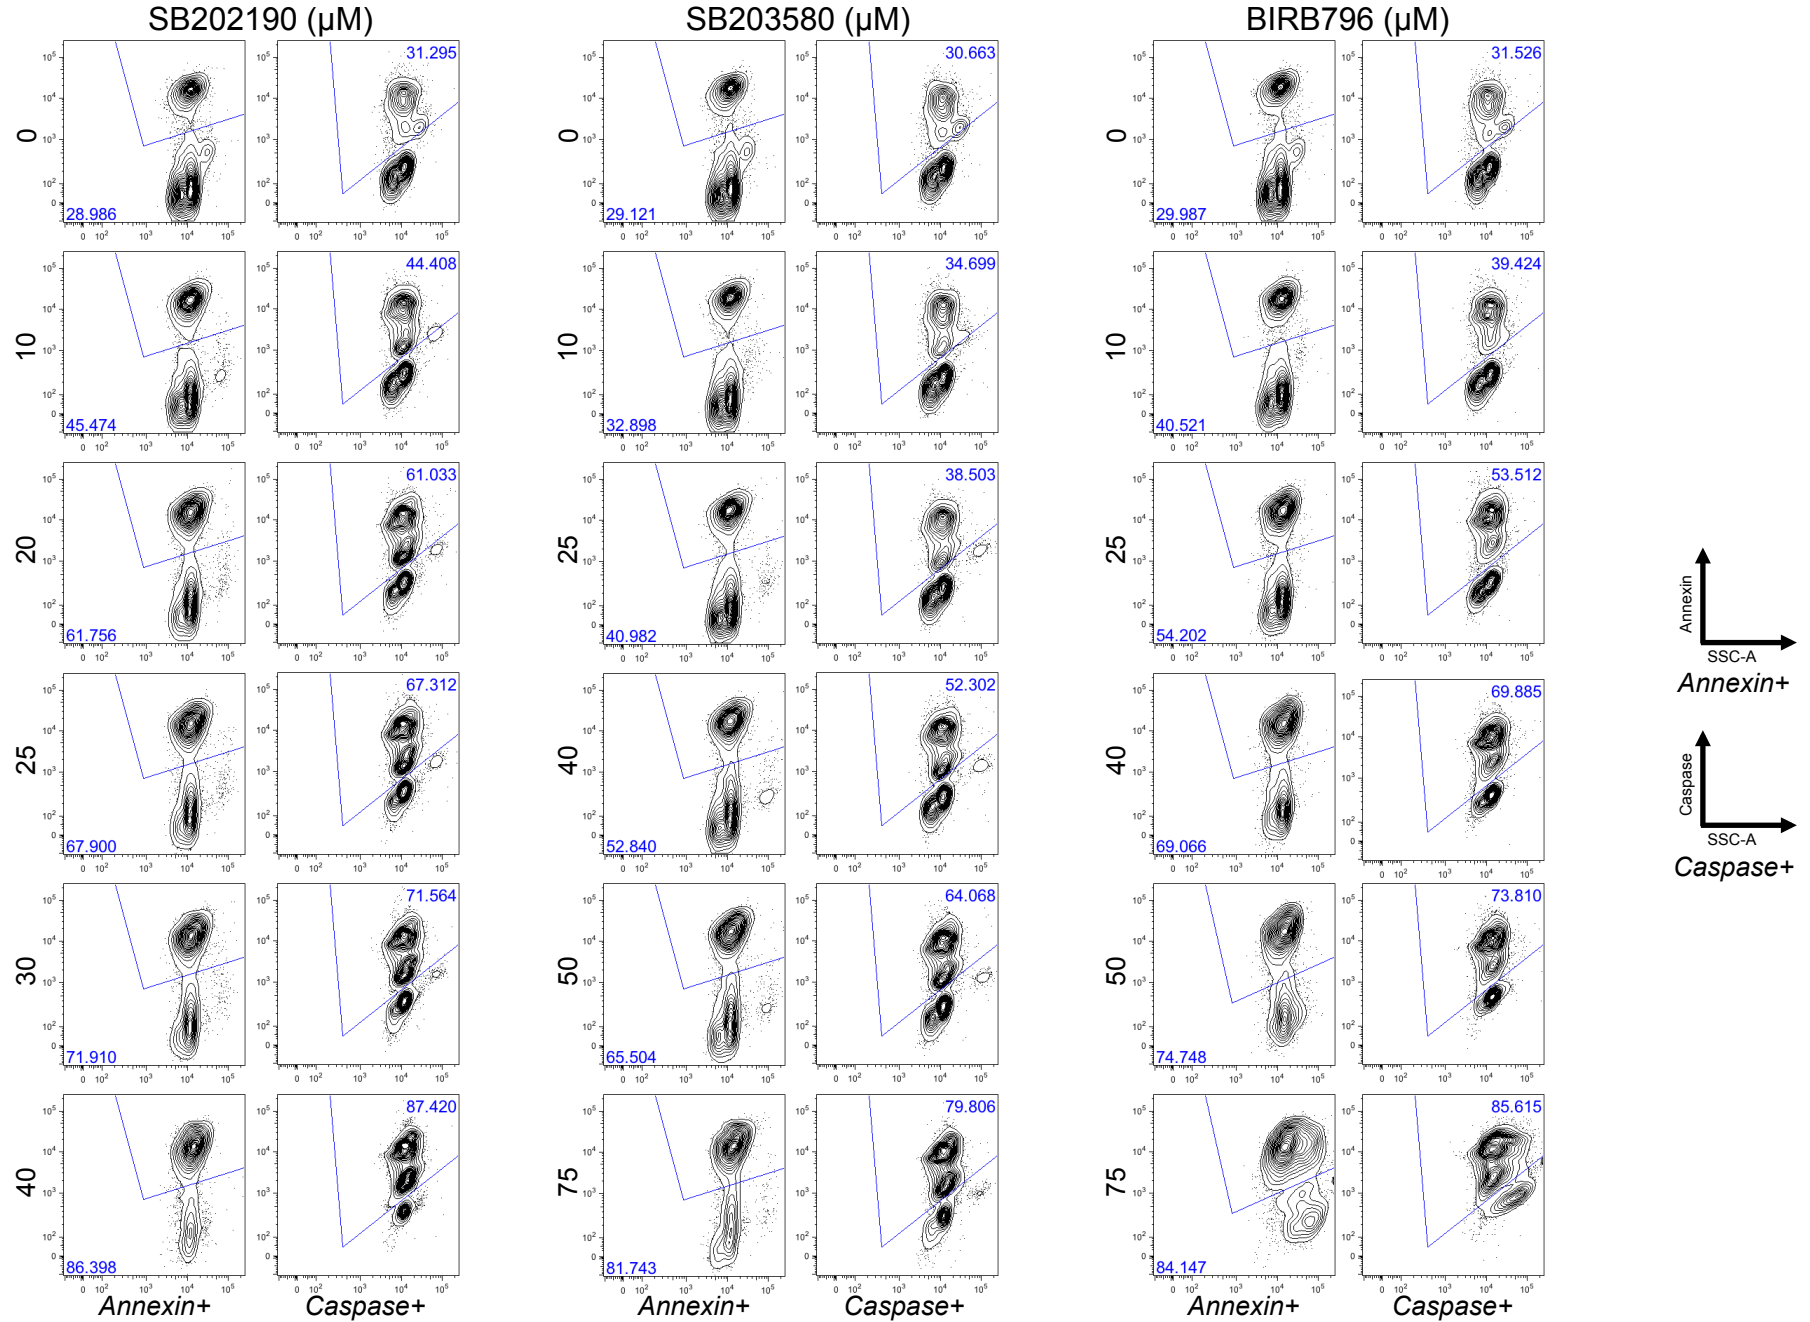

### Supplemental Figure S8. Importance of p38 signaling in primary SS patient samples, confirmation of cell death by Cleaved Caspase 3/7 staining.

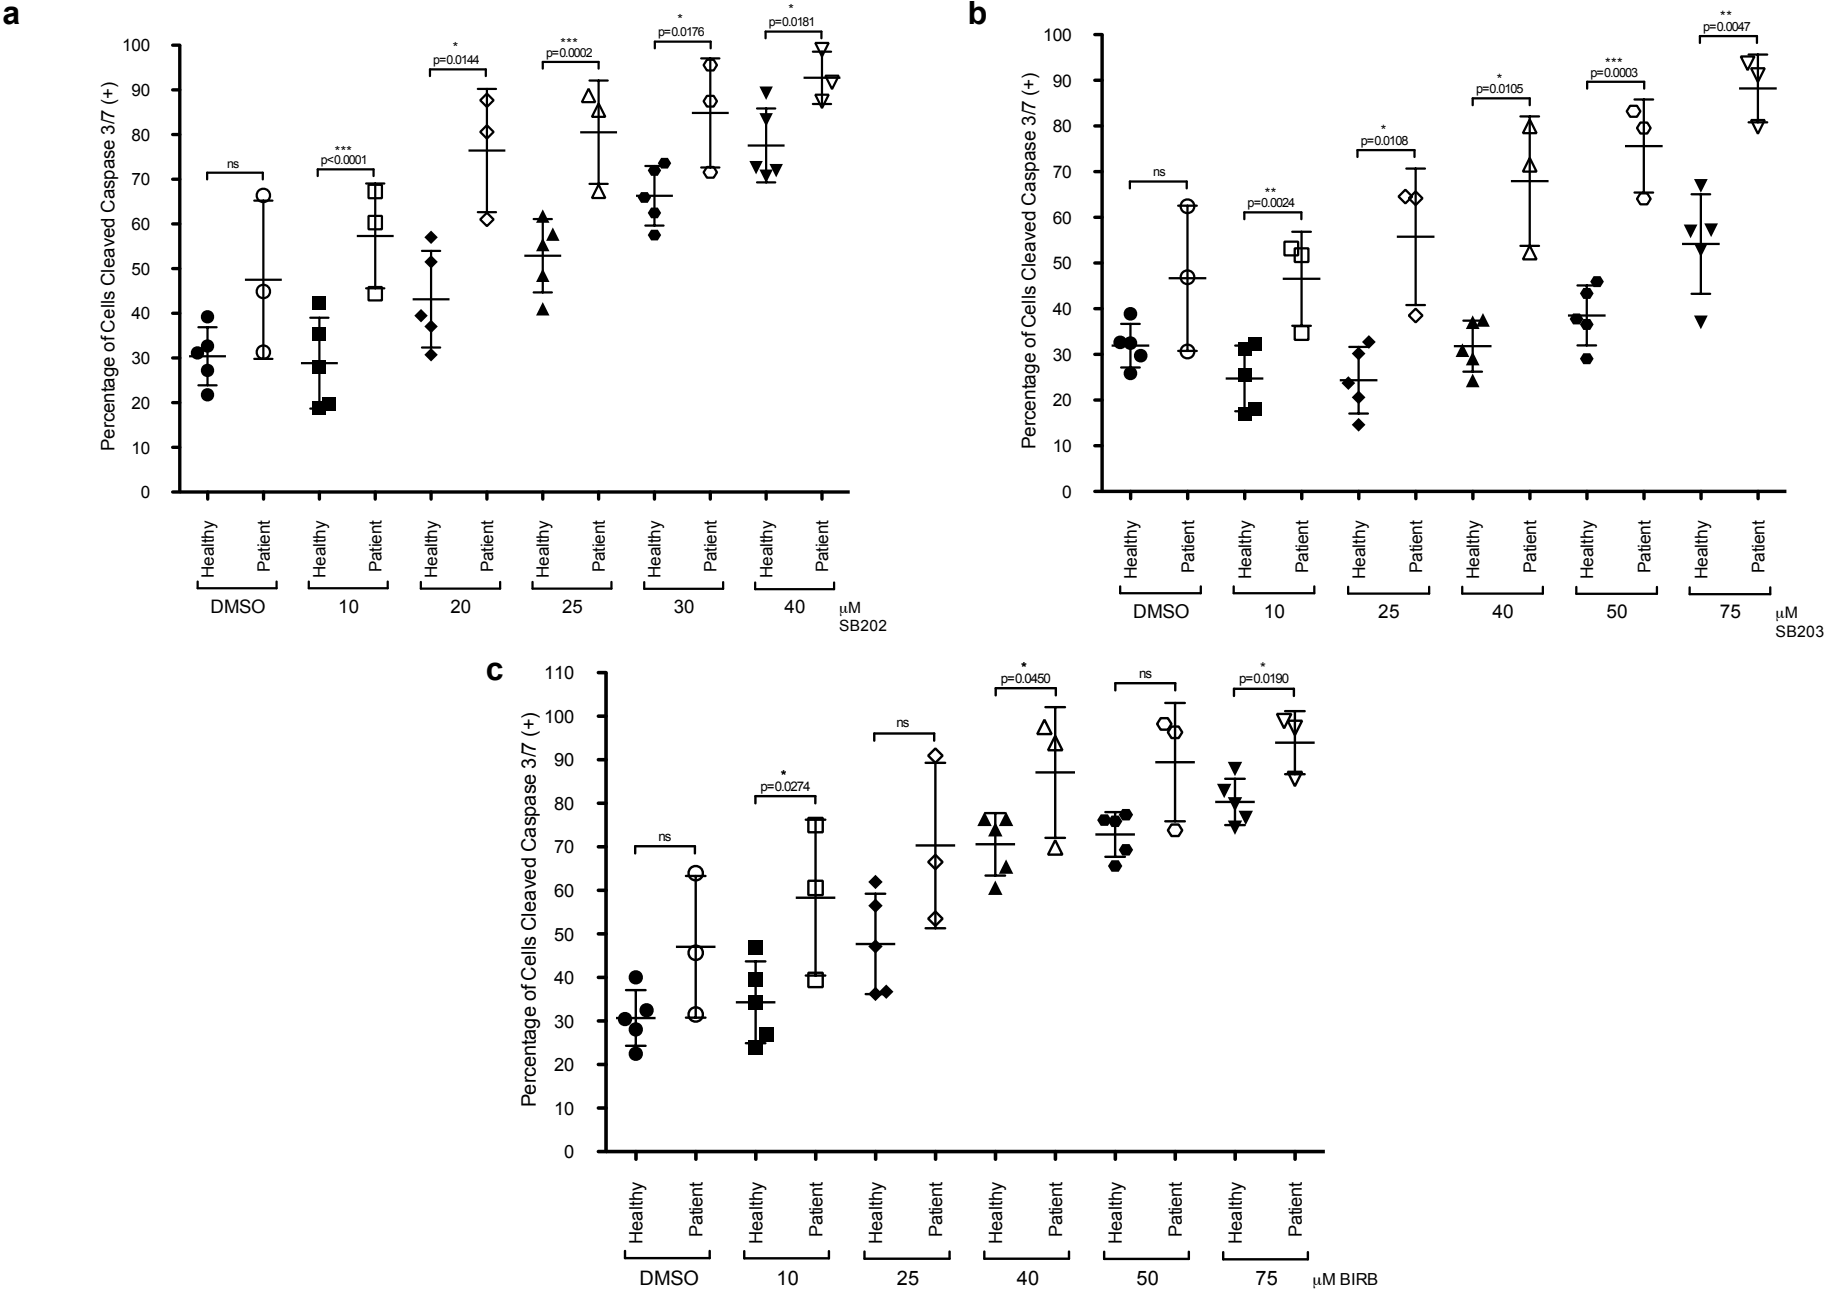

Supplement: NIHMS622328-supplement-01.pdf [file NIHMS622328-supplement-01.pdf]
